# Supplementary material for: Matrix-Assisted Laser Desorption/Ionization (MALDI) Mass Spectrometry Imaging of L-4-Phenylalanineboronic Acid (BPA) in a Brain Tumor Model Rat for Boron Neutron Capture Therapy (BNCT)
Source: PubMed Central journal article supplement (PMC9853116; doi:10.5702/massspectrometry.a0105), 2022-12-20
Supplement: massspectrometry-11-1-A0105_s001.pdf [file massspectrometry-11-1-A0105_s001.pdf]

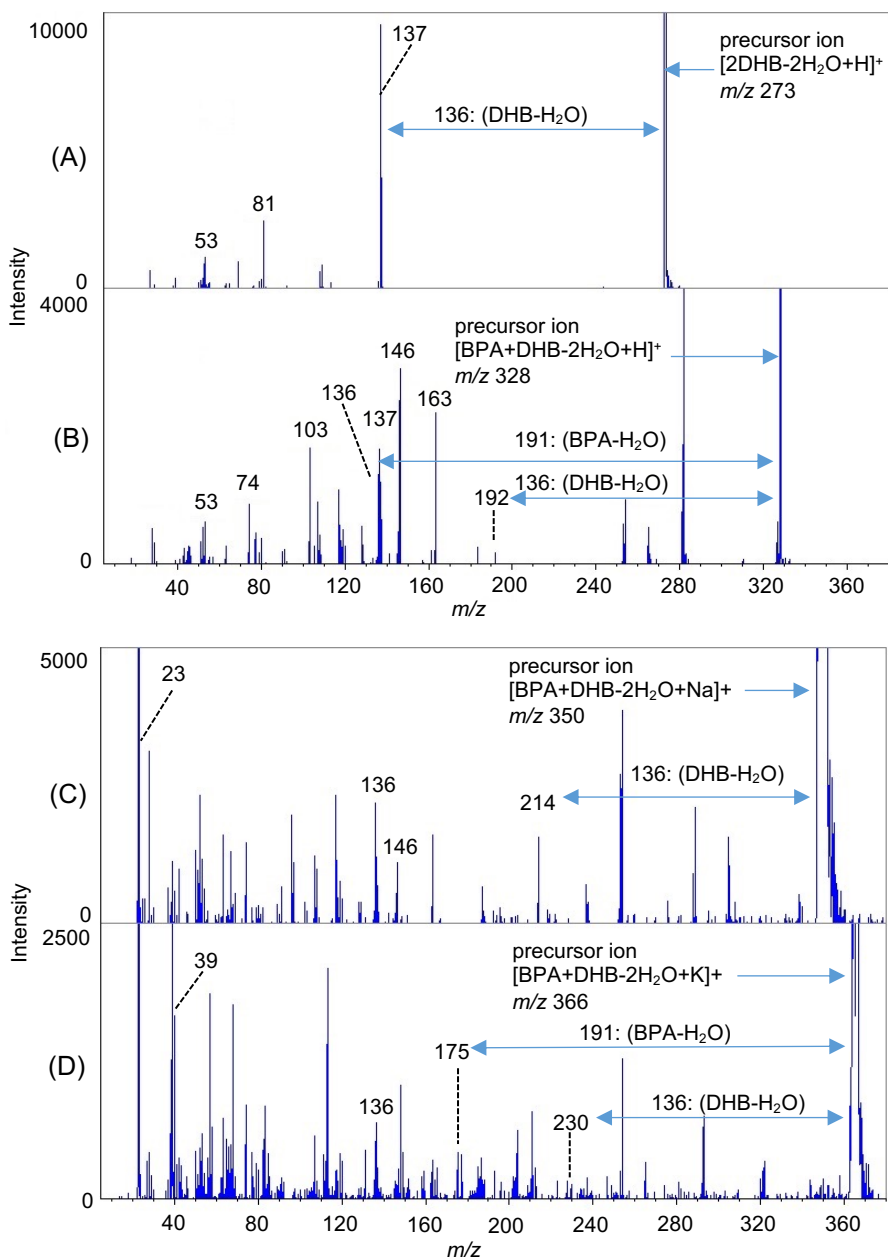

Supplementary figure 1. Product ion spectra obtained from the precursor ions, (A)  $[2\text{DHB}-2\text{H}_2\text{O}+\text{H}]^+$  at  $m/z$  273, (B)  $[\text{BPA}+\text{DHB}-2\text{H}_2\text{O}+\text{H}]^+$  at  $m/z$  328, (C)  $[\text{BPA}+\text{DHB}-2\text{H}_2\text{O}+\text{Na}]^+$  at  $m/z$  350 and (D)  $[\text{BPA}+\text{DHB}-2\text{H}_2\text{O}+\text{K}]^+$  at  $m/z$  366 in the MS/MS measurement of 250 pmol-BPA standard spot. The neutral loss corresponding to the formula of (DHB-H<sub>2</sub>O) or (BPA-H<sub>2</sub>O) was detected in each product ion spectra.

The spectrum data files are available in J-STAGE Data.

<https://doi.org/10.50893/data.massspectrometry.21522303>

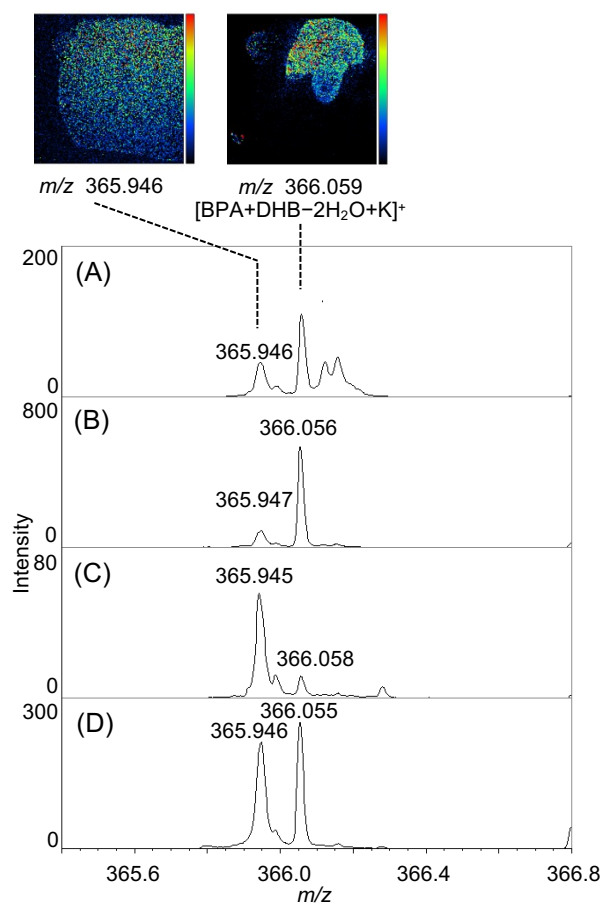

Supplementary figure 2. Mass images obtained from each peak around  $m/z$  366 in a mass window of 0.02 Da and the averaged mass spectra by a pixel extracted from (A) tumor region, (B) 10pmol-BPA spotted tumor region, (C) cortex region and (D) 50pmol-BPA spotted cortex region in the BPA dosed brain tissue section. The relative intensities of the peak at  $m/z$  366.059 (in the case of A) to the peak at  $m/z$  365.95 increased after BPA spotting in tumor or cerebral cortex area.
